# Supplementary material for: Early-to-mid stage idiopathic Parkinson’s disease shows enhanced cytotoxicity and differentiation in CD8 T-cells in females
Source: PubMed Central journal article supplement (PMC10662447; doi:10.1038/s41467-023-43053-0), 2023-11-20
Supplement: 41467_2023_43053_MOESM1_ESM.pdf [file 41467_2023_43053_MOESM1_ESM.pdf]

# Early-to-mid stage idiopathic Parkinson's disease shows enhanced cytotoxicity and differentiation in CD8 T-cells in females

## Supplementary Information

Christophe M. Capelle<sup>1, 2, §</sup>, Séverine Ciré<sup>1, £</sup>, Fanny Hedin<sup>3</sup>, Maxime Hansen<sup>4, 5</sup>, Lukas Pavelka<sup>4, 5, 6</sup>, Kamil Grzyb<sup>4</sup>, Dimitrios Kyriakis<sup>4, ¥</sup>, Oliver Hunewald<sup>1</sup>, Maria Konstantinou<sup>3</sup>, Dominique Revets<sup>3</sup>, Vera Tslaf<sup>1, 2, 6</sup>, Tainá M. Marques<sup>6</sup>, Clarissa P. C. Gomes<sup>4</sup>, Alexandre Baron<sup>1</sup>, Olivia Domingues<sup>1</sup>, Mario Gomez<sup>3</sup>, Ni Zeng<sup>1, 2</sup>, Fay Betsou<sup>7, 8</sup>, Patrick May<sup>4</sup>, Alexander Skupin<sup>4, 9, 10</sup>, Antonio Cosma<sup>3</sup>, Rudi Balling<sup>4, 11</sup>, Rejko Krüger<sup>4, 5, 6</sup>, Markus Ollert<sup>1, 12, \*</sup>, Feng Q. Hefeng<sup>1, 13, \*</sup>

<sup>1</sup> Department of Infection and Immunity, Luxembourg Institute of Health (LIH), 29, rue Henri Koch, L-4354, Esch-sur-Alzette, Luxembourg

<sup>2</sup> Faculty of Science, Technology and Medicine, University of Luxembourg, 2, avenue de Université, L-4365, Esch-sur-Alzette, Luxembourg

<sup>3</sup> National Cytometry Platform, Luxembourg Institute of Health, 29, rue Henri Koch, L-4354 Esch-sur-Alzette, Luxembourg

<sup>4</sup> Luxembourg Centre for Systems Biomedicine (LCSB), University of Luxembourg, 6, avenue du Swing, L-4367, Belvaux, Luxembourg

<sup>5</sup> Parkinson Research Clinic, Centre Hospitalier de Luxembourg (CHL), 4, Rue Nicolas Ernest Barblé, L-1210, Luxembourg, Luxembourg

<sup>6</sup> Transversal Translational Medicine, Luxembourg Institute of Health, 1A-B, rue Thomas Edison, L-1445, Strassen, Luxembourg

<sup>7</sup> Integrated Biobank of Luxembourg (IBBL), 1, rue Louis Rech, L-3555, Dudelange, Luxembourg

<sup>8</sup> CRBIP, Institut Pasteur, Université Paris Cité, Paris, France

<sup>9</sup> Department of Physics and Material Science, 162a, av. de la Faïencerie, L-1511, Luxembourg, Luxembourg

<sup>10</sup> Department of Neurosciences, University California San Diego School of Medicine, 9500 Gilman Drive, La Jolla, CA 92093-0662, USA

<sup>11</sup> Institute of Molecular Psychiatry, University of Bonn, Venusberg-Campus 1, D-53127, Bonn, Germany

<sup>12</sup> Department of Dermatology and Allergy Center, Odense Research Center for Anaphylaxis (ORCA), University of Southern Denmark, Odense, 5000 C, Denmark

<sup>13</sup> Data Integration and Analysis Unit, Luxembourg Institute of Health (LIH), L-1445 Strassen, Luxembourg

<sup>§</sup> Current address, Institute of Microbiology, ETH Zurich, Vladimir-Prelog-Weg 4, CH-8049 Zurich, Switzerland

<sup>£</sup> Current address, Eligo Bioscience, 111, avenue de France, 75013 Paris, France

<sup>¥</sup> Current address, Icahn School of Medicine at Mount Sinai, New York, NY 10029, USA

\* Corresponding author. Correspondence to M.O. ([Markus.ollert@lih.lu](mailto:Markus.ollert@lih.lu)) or F.Q.H. ([feng.he@lih.lu](mailto:feng.he@lih.lu))

Supplementary Note 1: Extended acknowledgement to the consortium members of the cohort used in this work.

We would like to thank all the anonymous participants of the Luxembourg Parkinson's Study for their important support of our research. Furthermore, we acknowledge the joint effort of the National Centre of Excellence in Research on Parkinson's Disease (NCER-PD) Consortium members from the partner institutions Luxembourg Centre for Systems Biomedicine, Luxembourg Institute of Health, Centre Hospitalier de Luxembourg, and Laboratoire National de Santé generally contributing to the Luxembourg Parkinson's Study as listed below: Geeta ACHARYA<sup>2</sup>, Gloria AGUAYO<sup>2</sup>, Myriam ALEXANDRE<sup>2</sup>, Muhammad ALI<sup>1</sup>, Wim AMMERLANN<sup>2</sup>, Giuseppe ARENA<sup>1</sup>, Rudi BALLING<sup>1</sup>, Michele BASSIS<sup>1</sup>, Roxane BATUTU<sup>3</sup>, Katy BEAUMONT<sup>2</sup>, Regina BECKER<sup>1</sup>, Camille BELLORA<sup>2</sup>, Guy BERCHEM<sup>3</sup>, Daniela BERG<sup>11</sup>, Alexandre BISSDORFF<sup>5</sup>, Ibrahim BOUSSAAD<sup>1</sup>, Kathrin BROCKMANN<sup>11</sup>, Jessica CALMES<sup>2</sup>, Lorieza CASTILLO<sup>2</sup>, Gessica CONTESOTTO<sup>2</sup>, Nancy DE BREMAEKER<sup>3</sup>, Nico DIEDERICH<sup>3</sup>, Rene DONDELINGER<sup>5</sup>, Daniela ESTEVES<sup>2</sup>, Guy FAGHERAZZI<sup>2</sup>, Jean-Yves FERRAND<sup>2</sup>, Manon GANTENBEIN<sup>2</sup>, Thomas GASSER<sup>11</sup>, Piotr GAWRON<sup>1</sup>, Soumyabrata GHOSH<sup>1</sup>, Marijus GIRAITIS<sup>2,3</sup>, Enrico GLAAB<sup>1</sup>, Elisa GÓMEZ DE LOPE<sup>1</sup>, Jérôme GRAAS<sup>2</sup>, Mariella GRAZIANO<sup>17</sup>, Valentin GROUES<sup>1</sup>, Anne GRÜNEWALD<sup>1</sup>, Wei GU<sup>1</sup>, Gaël HAMMOT<sup>2</sup>, Anne-Marie HANFF<sup>2</sup>, Linda HANSEN<sup>1,3</sup>, Michael HENEKA<sup>1</sup>, Estelle HENRY<sup>2</sup>, Sylvia HERBRINK<sup>6</sup>, Sascha HERZINGER<sup>1</sup>, Michael HEYMANN<sup>2</sup>, Michele HU<sup>8</sup>, Alexander HUNDT<sup>2</sup>, Nadine JACOBY<sup>18</sup>, Jacek JAROSLAW LEBIODA<sup>1</sup>, Yohan JAROZ<sup>1</sup>, Sonja JÓNSDÓTTIR<sup>2</sup>, Quentin KLOPFENSTEIN<sup>1</sup>, Jochen KLUCKEN<sup>1,2,3</sup>, Rejko KRÜGER<sup>1,2,3</sup>, Pauline LAMBERT<sup>2</sup>, Zied LANDOULSI<sup>1</sup>, Roseline LENTZ<sup>7</sup>, Inga LIEPELT<sup>11</sup>, Robert LISZKA<sup>14</sup>, Laura LONGHINO<sup>3</sup>, Victoria LORENTZ<sup>2</sup>, Paula Cristina LUPU<sup>2</sup>, Clare MACKAY<sup>10</sup>, Walter MAETZLER<sup>15</sup>, Katrin MARCUS<sup>13</sup>, Guilherme MARQUES<sup>2</sup>, Tainá M. MARQUES<sup>1</sup>, Patricia MARTINS CONDE<sup>1</sup>, Patrick MAY<sup>1</sup>, Deborah MCINTYRE<sup>2</sup>, Chouaib MADIOUNI<sup>2</sup>, Françoise MEISCH<sup>1</sup>, Myriam MENSTER<sup>2</sup>, Maura MINELLI<sup>2</sup>, Michel MITTELBRONN<sup>1,4</sup>, Brit MOLLENHAUER<sup>12</sup>, Friedrich MÜHLSCHLEGEL<sup>4</sup>, Romain NATI<sup>3</sup>, Ulf NEHRBASS<sup>2</sup>, Sarah NICKELS<sup>1</sup>, Beatrice NICOLAI<sup>3</sup>, Jean-Paul NICOLAY<sup>19</sup>, Fozia NOOR<sup>2</sup>, Marek OSTASZEWSKI<sup>1</sup>, Clarissa P. C. GOMES<sup>1</sup>, Sinthuja PACHCHEK<sup>1</sup>, Claire PAULY<sup>1,3</sup>, Laure PAULY<sup>1</sup>, Lukas PAVELKA<sup>1,3</sup>, Magali PERQUIN<sup>2</sup>, Rosalina RAMOS LIMA<sup>2</sup>, Armin RAUSCHENBERGER<sup>1</sup>, Rajesh RAWAL<sup>1</sup>, Dheeraj REDDY BOBBILI<sup>1</sup>, Kirsten ROOMP<sup>1</sup>, Eduardo ROSALES<sup>2</sup>, Isabel ROSETY<sup>1</sup>, Estelle SANDT<sup>2</sup>, Stefano SAPIENZA<sup>1</sup>, Venkata SATAGOPAM<sup>1</sup>, Margaux SCHMITT<sup>2</sup>, Sabine SCHMITZ<sup>1</sup>, Reinhard SCHNEIDER<sup>1</sup>, Jens SCHWAMBORN<sup>1</sup>, Amir SHARIFY<sup>2</sup>, Ekaterina SOBOLEVA<sup>1</sup>, Kate SOKOLOWSKA<sup>2</sup>, Hermann THIEN<sup>2</sup>, Elodie THIRY<sup>3</sup>, Rebecca TING JIIN LOO<sup>1</sup>, Christophe TREFOIS<sup>1</sup>, Johanna TROUET<sup>2</sup>, Olena TSURKALENKO<sup>2</sup>, Michel VAILLANT<sup>2</sup>, Mesele VALENTI<sup>2</sup>, Carlos VEGA<sup>1</sup>, Liliana VILAS BOAS<sup>3</sup>, Maharshi VYAS<sup>1</sup>,

Richard WADE-MARTINS<sup>9</sup>, Paul WILMES<sup>1</sup>, Evi WOLLSCHIED-LENGELING<sup>1</sup>, Gelani ZELIMKHANOV<sup>3</sup>. The affiliations of individuals are listed as follows. <sup>1</sup> Luxembourg Centre for Systems Biomedicine, University of Luxembourg, Esch-sur-Alzette, Luxembourg; <sup>2</sup> Luxembourg Institute of Health, Strassen, Luxembourg; <sup>3</sup> Centre Hospitalier de Luxembourg, Strassen, Luxembourg; <sup>4</sup> Laboratoire National de Santé, Dudelange, Luxembourg; <sup>5</sup> Centre Hospitalier Emile Mayrisch, Esch-sur-Alzette, Luxembourg; <sup>6</sup> Centre Hospitalier du Nord, Ettelbrück, Luxembourg; <sup>7</sup> Parkinson Luxembourg Association, Leudelange, Luxembourg; <sup>8</sup> Oxford Parkinson's Disease Centre, Nuffield Department of Clinical Neurosciences, University of Oxford, Oxford, UK; <sup>9</sup> Oxford Parkinson's Disease Centre, Department of Physiology, Anatomy and Genetics, University of Oxford, Oxford, UK; <sup>10</sup> Oxford Centre for Human Brain Activity, Wellcome Centre for Integrative Neuroimaging, Department of Psychiatry, University of Oxford, Oxford, UK; <sup>11</sup> Center of Neurology and Hertie Institute for Clinical Brain Research, Department of Neurodegenerative Diseases, University Hospital Tübingen, Tübingen, Germany; <sup>12</sup> Paracelsus-Elena-Klinik, Kassel, Germany; <sup>13</sup> Ruhr-University of Bochum, Bochum, Germany; <sup>14</sup> Westpfalz-Klinikum GmbH, Kaiserslautern, Germany; <sup>15</sup> Department of Neurology, University Medical Center Schleswig-Holstein, Kiel, Germany; <sup>16</sup> Department of Neurology Philipps, University Marburg, Marburg, Germany; <sup>17</sup> Association of Physiotherapists in Parkinson's Disease Europe, Esch-sur-Alzette, Luxembourg; <sup>18</sup> Private practice, Ettelbruck, Luxembourg; <sup>19</sup> Private practice, Luxembourg, Luxembourg.

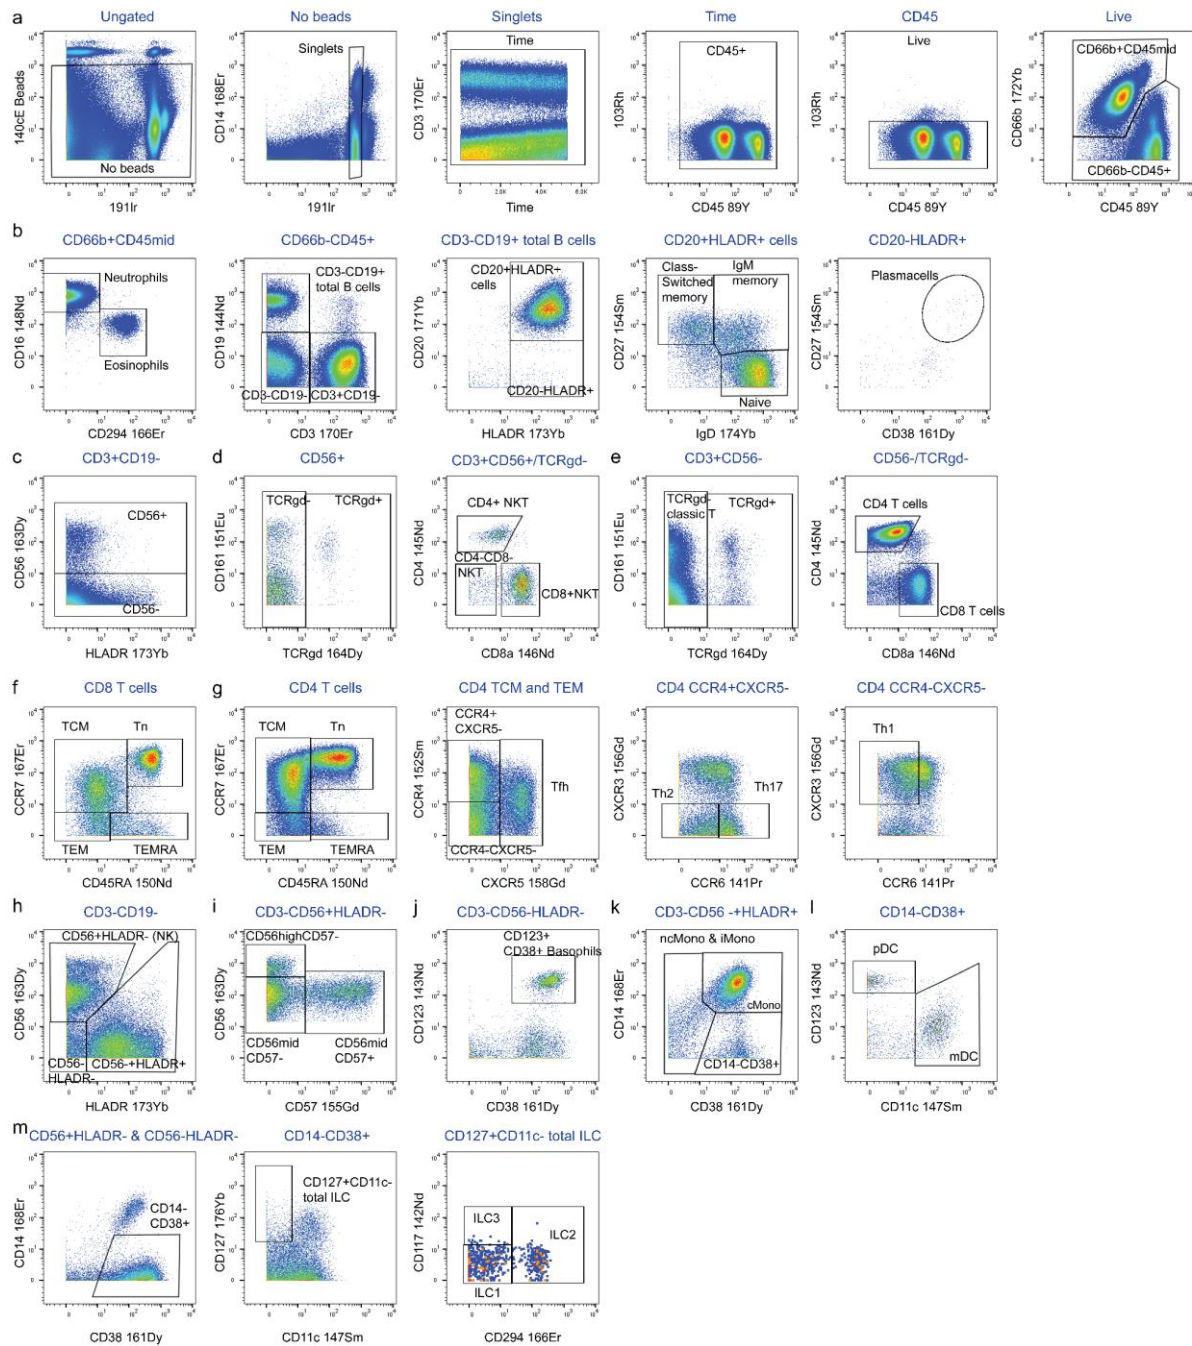

### Supplementary Fig. 1. CyTOF gating strategy used in this study.

The gating strategy of the CyTOF analysis for various peripheral immune (sub-)populations from whole blood. The CyTOF markers used in this study are provided in **Supplementary Table 3**. Labels for some of the major subsets are enlarged. The corresponding parent gate was labelled in blue above the corresponding cytometry plot. To increase the explorability, we divided the overall gating strategy into different subpanels, including the initial general gating (singlet, living cells etc.) **(a)**, B cell subsets and neutrophils/eosinophils gates **(b)**, gates separating CD56+/CD56- cells **(c)**, natural killer T (NKT) subsets **(d)**, gdT cells as well as total CD4 and CD8 T cells **(e)**, CD8 naïve/memory subsets **(f)**, CD4 subsets **(g)**, natural killer (NK)

starting gates (**h**), NK subsets (**i**), basophils (**j**), monocyte subsets (**k**), dendritic cell (DC) subsets (**l**) and innate lymphoid cell (ILC) subsets (**m**). cMono, classical monocytes; iMono, intermediate monocytes; ncMono, non-classical monocytes; mDC, myeloid DC; pDC, plasmacytoid DC; Tn, naïve T cells; TCM, central memory T cells; TEM, effector memory T cells; TEMRA, terminally-differentiated effector memory T cells; Th1/Th2/Th17, type 1/2/17 T helper cells; Tfh, T follicular helper cells.

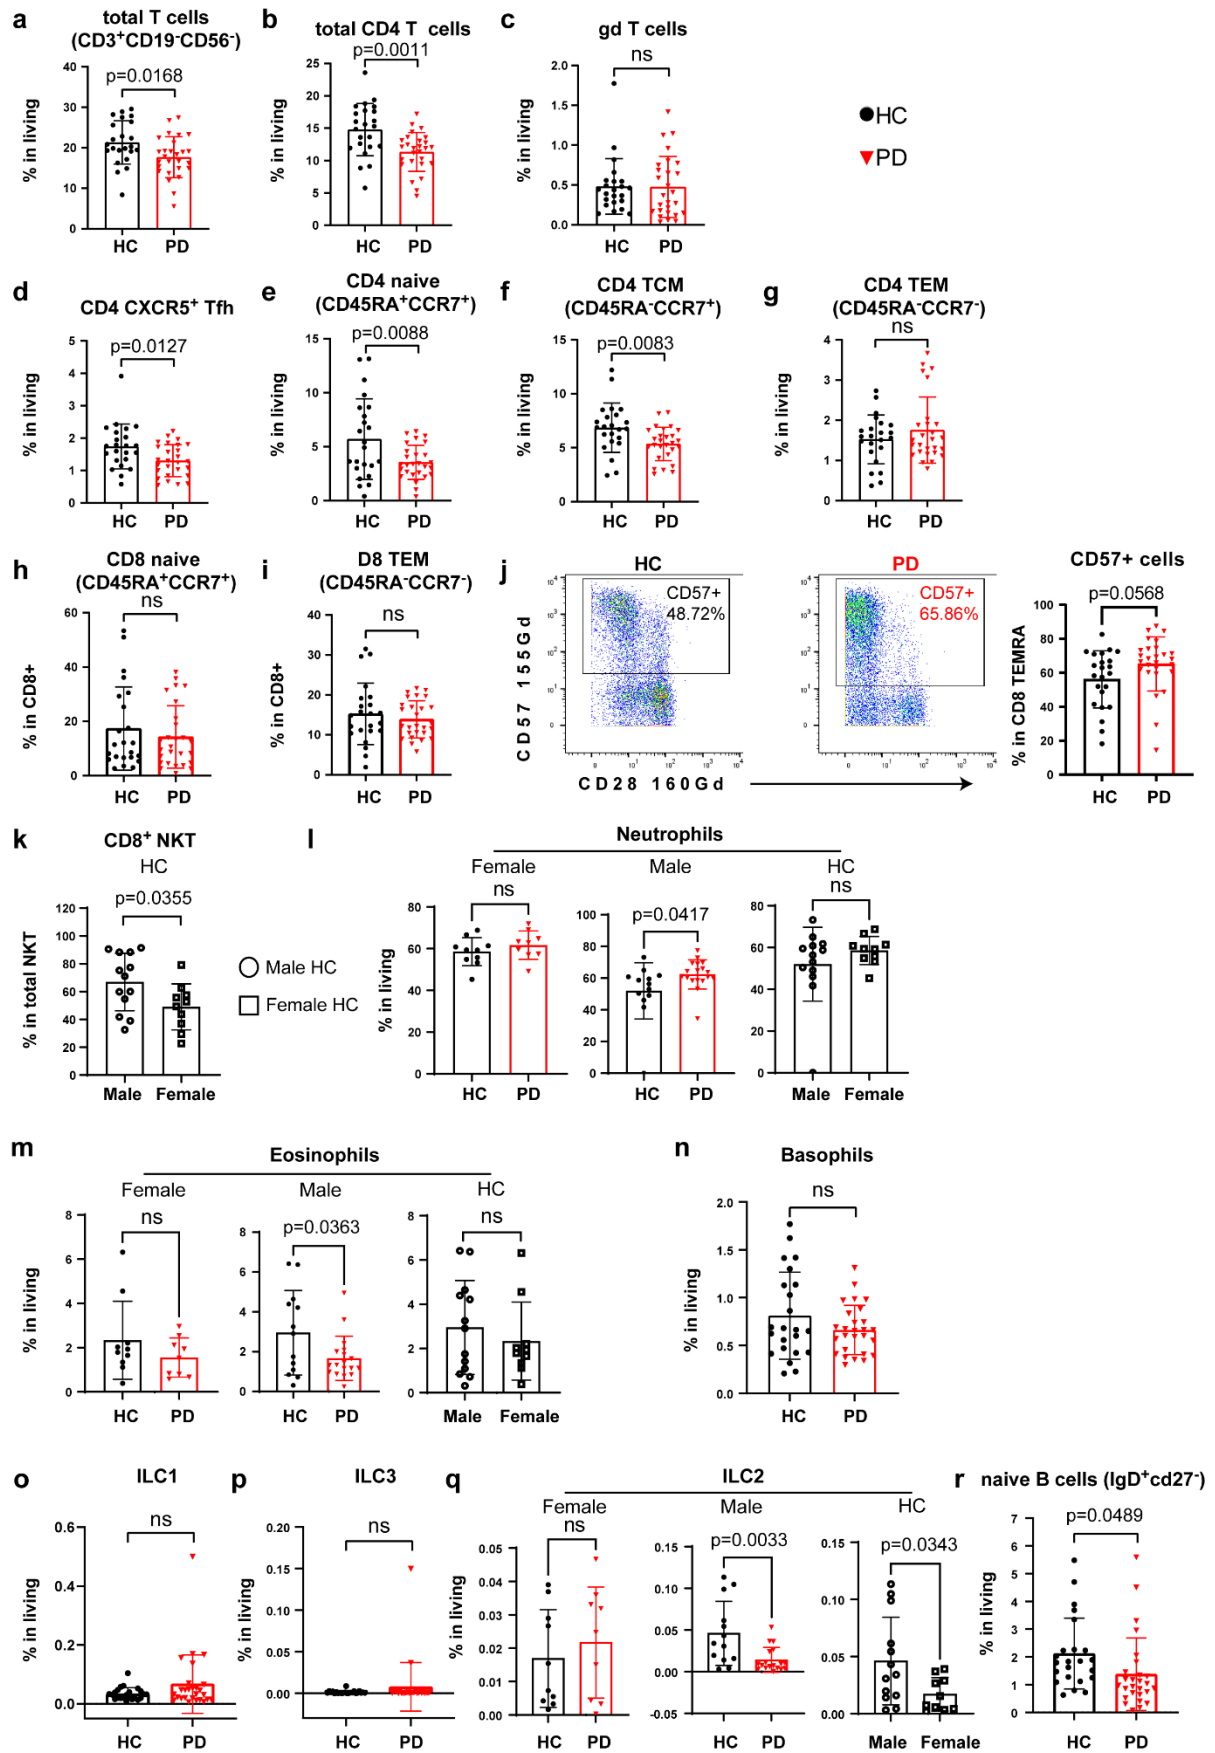



## Supplementary Fig. 2. Extended analysis on major immune subsets examined by CyTOF.

**a-c** Scatter dot plots showing the frequency of total CD3 T cells (CD3<sup>+</sup>CD19<sup>-</sup>CD56<sup>-</sup>) (**a**), total CD4 T cells (**b**) and  $\gamma\delta$  T cells (**c**) among living CD45<sup>+</sup> cells in PD and HC, as analyzed by CyTOF. **d-g** Scatter dot plots showing the frequency of circulating CD4 CXCR5<sup>+</sup> T follicular help (Tfh) (**d**), CD45RA<sup>+</sup>CCR7<sup>+</sup> naïve (**e**), CD45RA<sup>-</sup>CCR7<sup>+</sup> central memory (TCM) (**f**) and CD45RA<sup>-</sup>CCR7<sup>-</sup> effector memory (TEM) (**g**) T cells. **h, i** Scatter dot plots showing the frequency of CD45RA<sup>+</sup>CCR7<sup>+</sup> naïve (**h**) and CD45RA<sup>-</sup>CCR7<sup>-</sup> effector memory (TEM) (**i**) among CD8 T cells. (**j**) Scatter dot plots showing the frequency of CD57<sup>+</sup> cells among CD8 TEMRA (CD45RA<sup>+</sup>CCR7<sup>-</sup>). Left panel, representative cytometry plots showing the expression of CD57 and CD28 in CD8 TEMRA. **k** Scatter dot plots showing the frequency of CD8<sup>+</sup> NKT among total NKT between male and female HC. **l, m, q** Scatter dot plots showing the frequency of neutrophils (**l**), eosinophils (**m**) or ILC2 (**q**) among living CD45<sup>+</sup> singlets in female (left) or male (middle) participants. The comparison between female and male HC was displayed in the right subpanel. **n-p, r** Scatter dot plots showing the frequency of basophils (**n**), ILC1 (**o**), ILC3 (**p**) and naïve B cells (**r**) among living CD45<sup>+</sup> immune cells. For detailed gating strategy, please refer to **Supplementary Fig. 1**. All the statistical description of major immune subsets was also provided in **Supplementary Table 5**. The combination of markers defining the corresponding subset was directly displayed in the panel title (**a-i**). The results were analyzed using unpaired two-tailed Student's *t* test. Data are presented as mean of the given group  $\pm$  standard deviation (s.d.). Each symbol represents the measurement from one individual participant (**a-r**). ns, not significant; all significant P-values are indicated. HC, healthy controls, n=24; PD, patients with Parkinson's disease, n=28. Of note, one PD and one HC were excluded due to technical failure during CyTOF staining. Female HC, n=10; female PD, n=9; male HC, n=13; male PD, n=18. NKT, Natural killer cells; ILC, innate lymphoid cells. Source data are provided as a Source Data file.

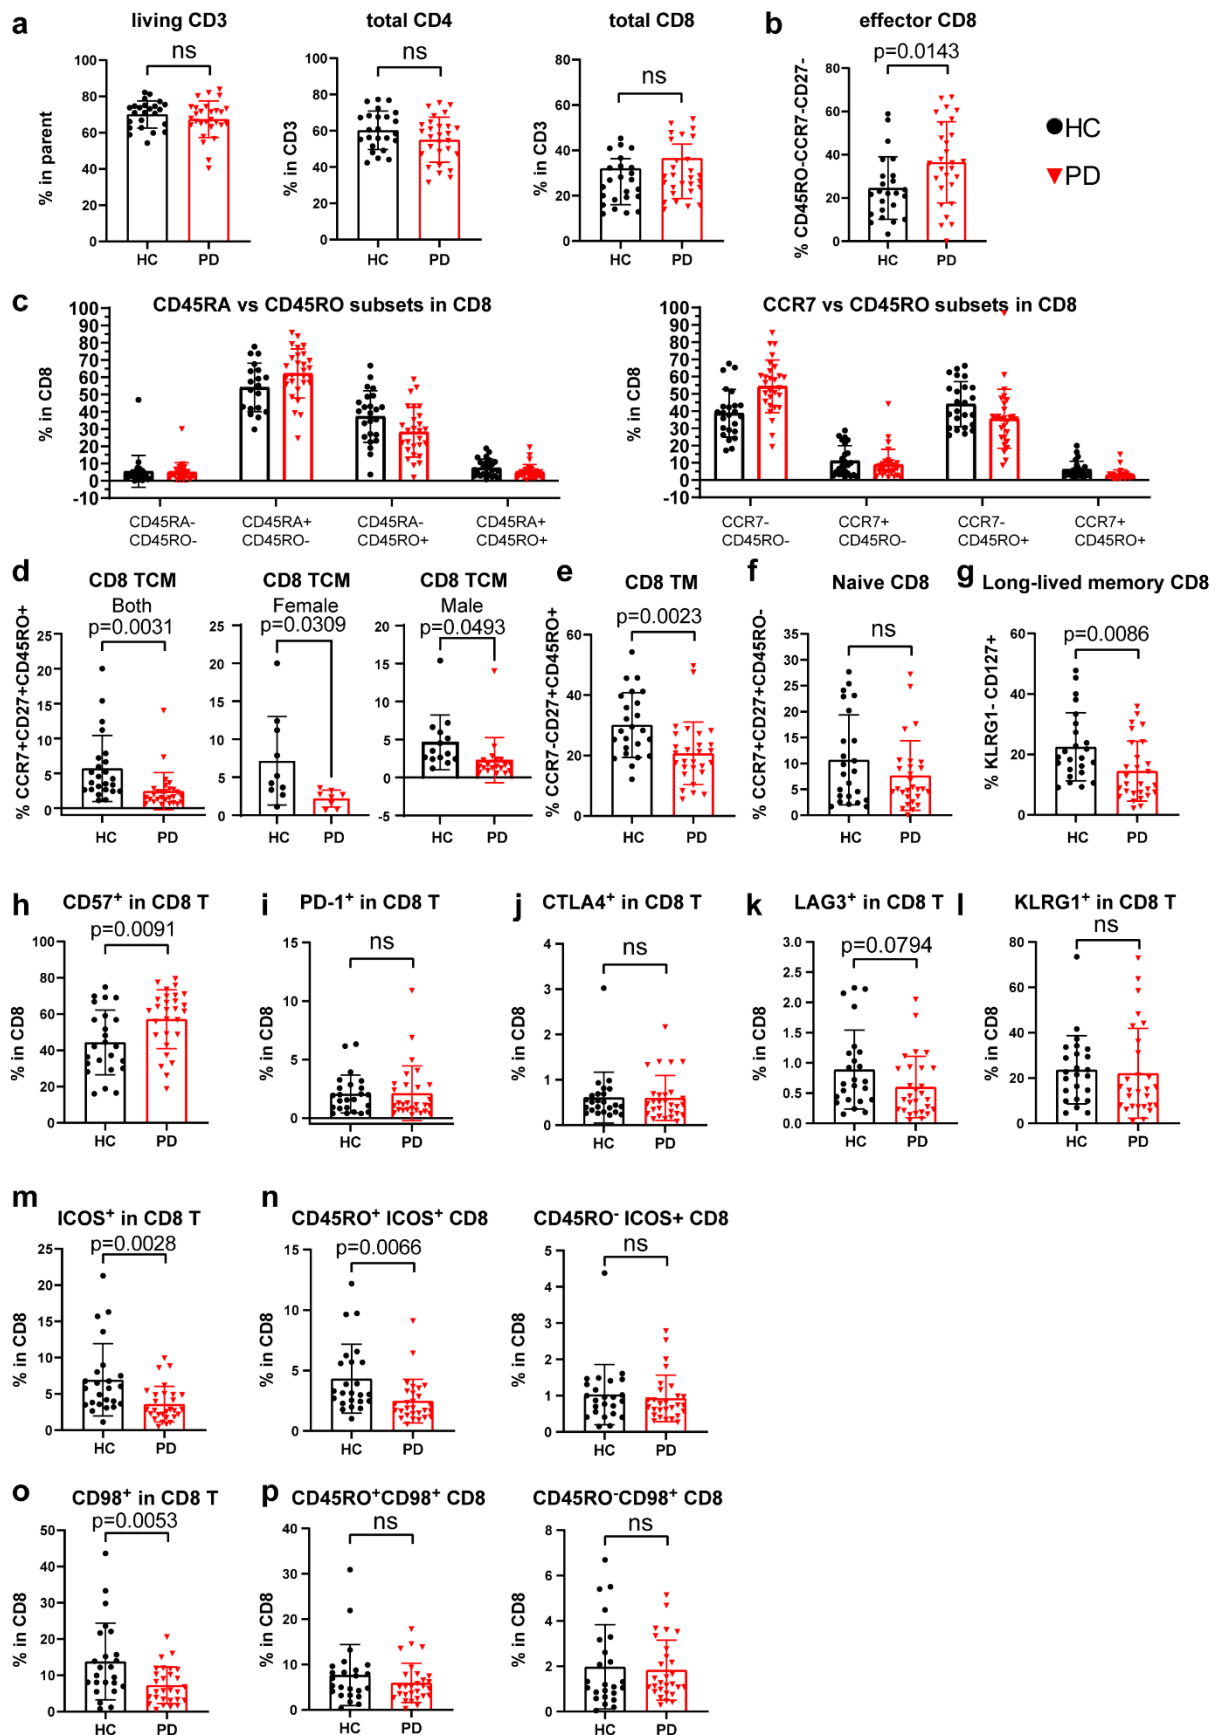



**Supplementary Fig. 3. Early-to-mid stage iPD shows fewer memory CD8 T cells and displays no sign of accelerated exhaustion.**

**a** Scatter dot plots showing the frequency of total CD3, CD4 and CD8 T cells in PD and HC as analyzed by FCM. The parent gate of CD3<sup>+</sup> cells is living lymphocyte singlets. **b** Scatter dot plots showing the frequency of effector CD8 T cells among total CD8 T cells. **c** Scatter dot plots showing the proportions of CD45RA vs CD45RO (left) and CCR7 vs CD45RO (right) quartered subpopulations of CD8 T cells. **d-g** Scatter dot plots showing the frequency of TCM (central memory) (**d**) for all (left) or females (middle) or males (right), TM (transitional memory) (**e**), naïve (**f**) and long-lived memory (**g**) among CD8 T cells in PD and HC. The combination of markers defining the corresponding subset was directly labelled in the y-axis title. **h-l** Scatter dot plots showing the frequency of CD57<sup>+</sup> (**h**), PD-1<sup>+</sup> (**i**), CTLA4<sup>+</sup> (**j**), LAG3<sup>+</sup> (**k**) and KLRG1<sup>+</sup> (**l**) populations among CD8 T cells. **m, n** Scatter dot plots showing the frequency of ICOS<sup>+</sup> cells (**m**), ICOS<sup>+</sup>CD45RO<sup>+</sup> or ICOS<sup>+</sup>CD45RO<sup>-</sup> cells (**n**) among total CD8 T cells in PD and HC. **o, p** Scatter dot plots showing the frequency of total CD98<sup>+</sup> populations (CD98: amino acid transporter) (**o**) as well as CD98<sup>+</sup>CD45RO<sup>+</sup> or CD98<sup>+</sup>CD45RO<sup>-</sup> cells (**p**) among total CD8 T cells. The results were analyzed using unpaired two-tailed Student *t* test. Data are presented as mean of the given group ± standard deviation (s.d.). Each symbol represents the measurement from one individual (**a-p**). ns, not significant; all significant P-values are indicated (except for **c**, where the purpose was only to show the relative average proportions of each of the four subsets). HC, healthy controls, n=24; PD, patients with Parkinson's disease, n=28. Female HC, n=10; female PD, n=8; male HC, n=14; male PD, n=19. Of note, for **d**, one female PD sample was excluded as the same patient visited twice within a short period. Source data are provided as a Source Data file.

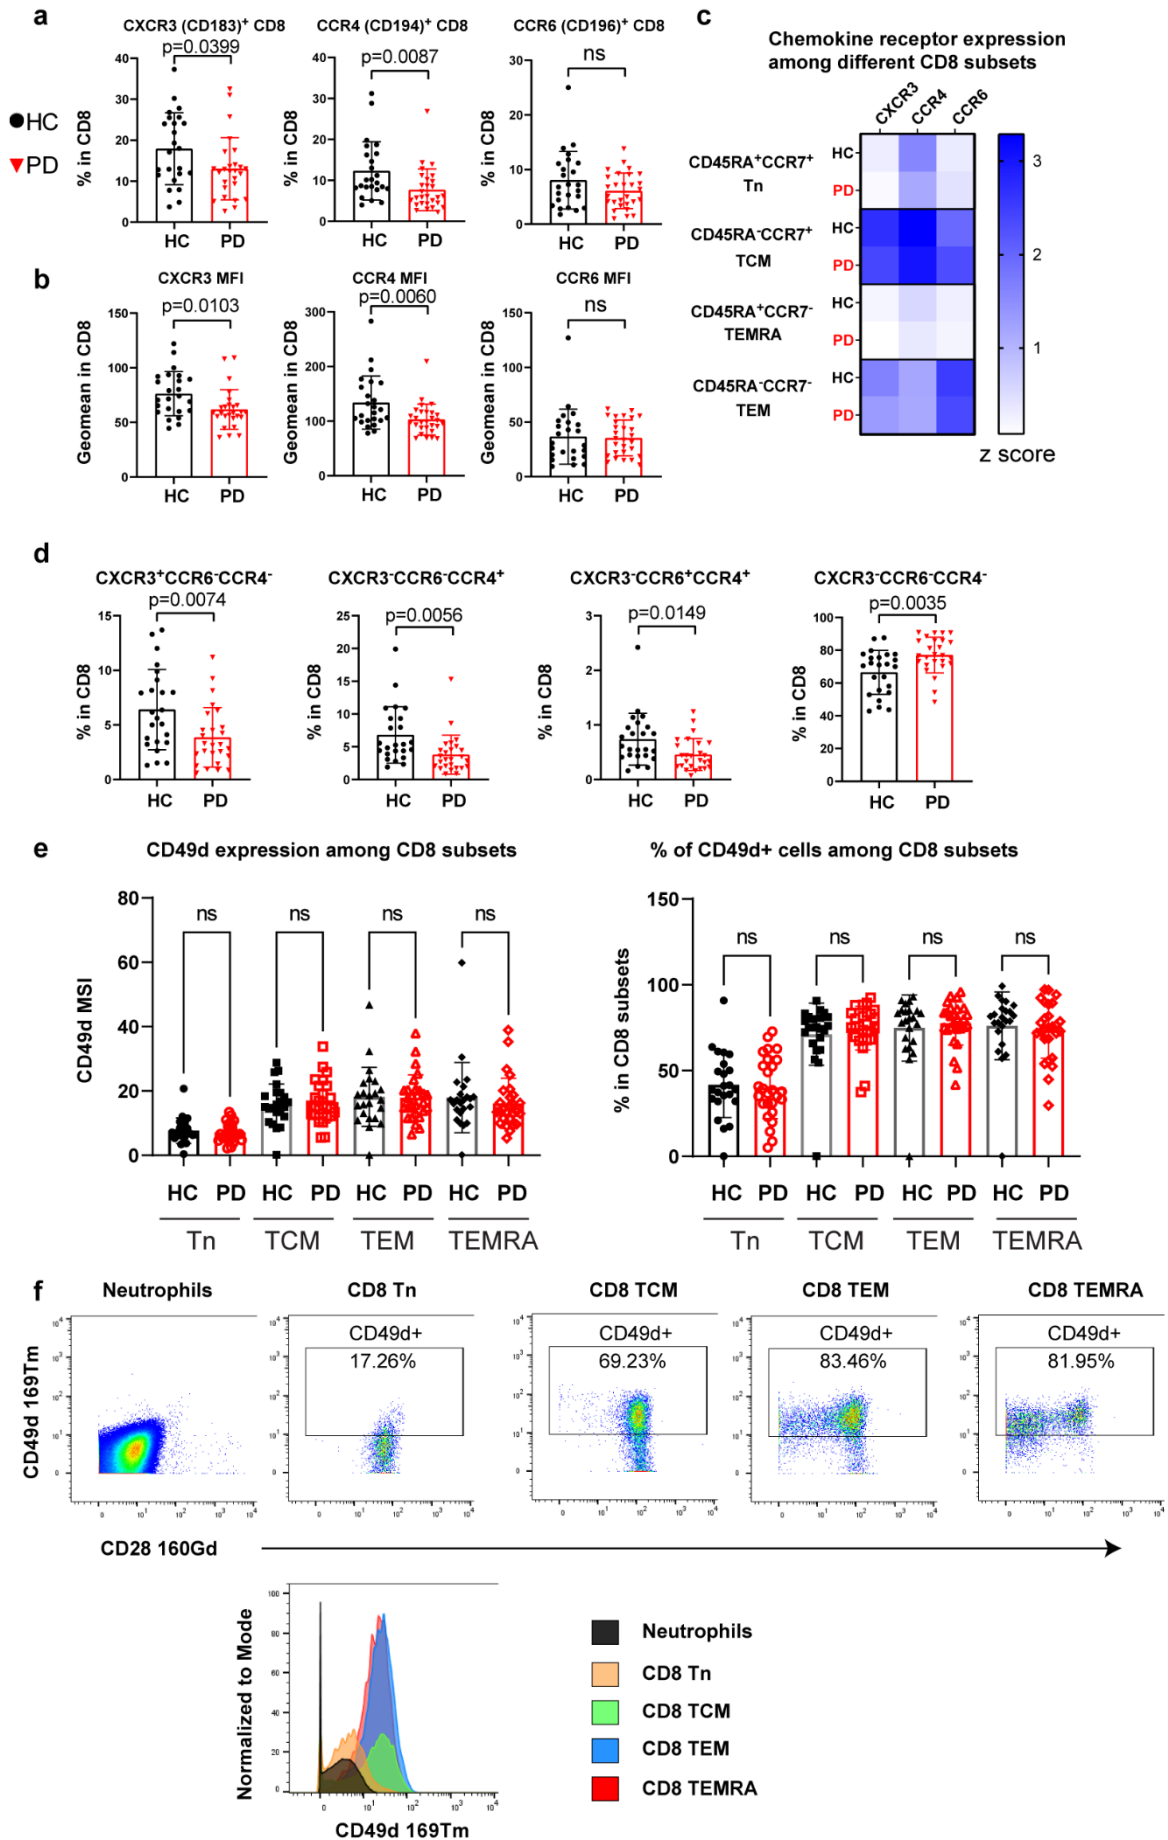

**Supplementary Fig. 4. CD8 TEMRA show normal expression of analyzed chemokine receptors and CD49d in early-to-mid stage iPD.**

**a** Scatter dot plots showing the frequency of CXCR3/CD183, CCR4/CD194 and CCR6/CD196 positive cells among total CD8 T cells. **b** Scatter dot plots showing the geometric mean (geomean, reflecting MFI) of CXCR3, CCR4 and CCR6 among total CD8 T cells. **c** Heatmap showing the averaged expression levels of the analyzed chemokine receptors in subpopulations of CD8 T cells for the given group. The frequency of cells expressing the given chemokine receptor was normalized along column. CCR7 expression was not shown because CCR7 was used to define CD8 naïve/memory T-cell subsets. **d** Scatter dot plots showing the frequency of CD8 T cells expressing different combinations of the chemokine receptors CXCR3, CCR4 and CCR6. **e** Scatter dot plots showing the expression level (MSI) of the brain homing factor CD49d (left) or the frequency of CD49d<sup>+</sup> cells (right) among different CD8 T-cell subsets. **f** Representative cytometry plots showing the expression of CD49d and CD28 among different cell types. Neutrophils were used as the negative controls here as they are known to be largely CD49d<sup>-</sup> in humans (Massena et al. 2015). Lower panel, histogram overlay of CD49d expression between different cell (sub) types. Data are presented as mean  $\pm$  standard deviation (s.d.). Each symbol represents the measurement from one individual participant (**a**, **b**, **d**, **e**). The results were analyzed using unpaired two-tailed Student's *t* test (**a**, **b**, **d**) while **e** was analyzed using ordinary one-way ANOVA test with two-stage linear step-up procedure of Benjamini/Krieger/Yekutieli correction. q-values (FDR) were analyzed for **e**. ns, not significant; all significant p-values are indicated. HC, healthy controls, n=24; PD, patients with Parkinson's disease, n=28; FCM, flow cytometry; MSI, median signal intensity; Tn, naïve T cells; TCM, central memory; TEM, effector memory. Of note, the CD49d expression was analyzed by CyTOF while the expression of the chemokine receptors was done using FCM. For FCM, two PD samples were excluded for CD183 related results where CD183 abs was missing during staining. Source data are provided as a Source Data file.

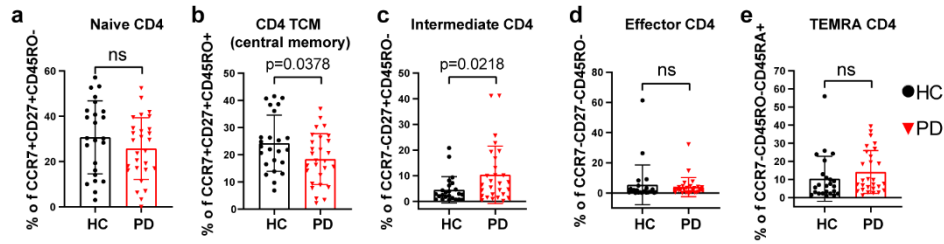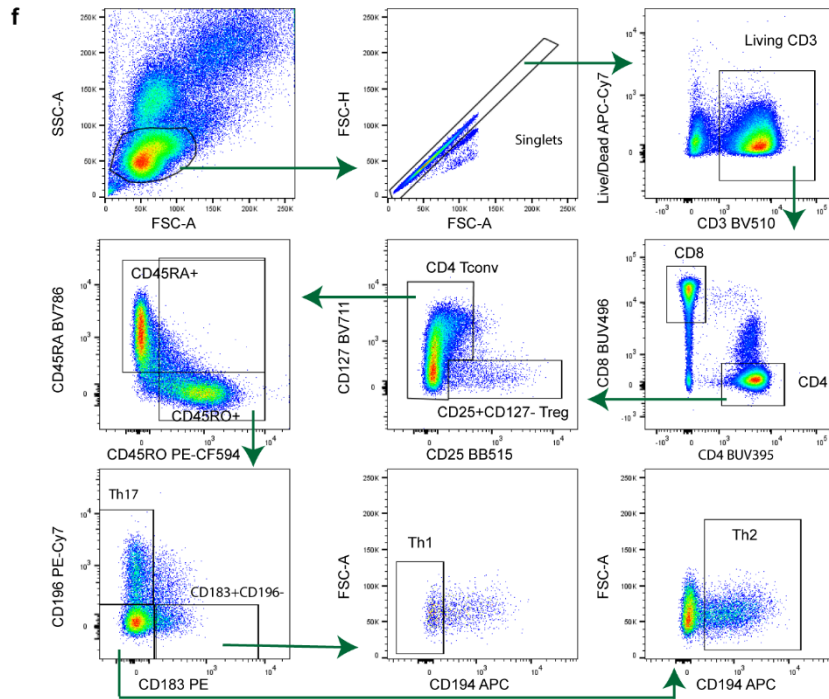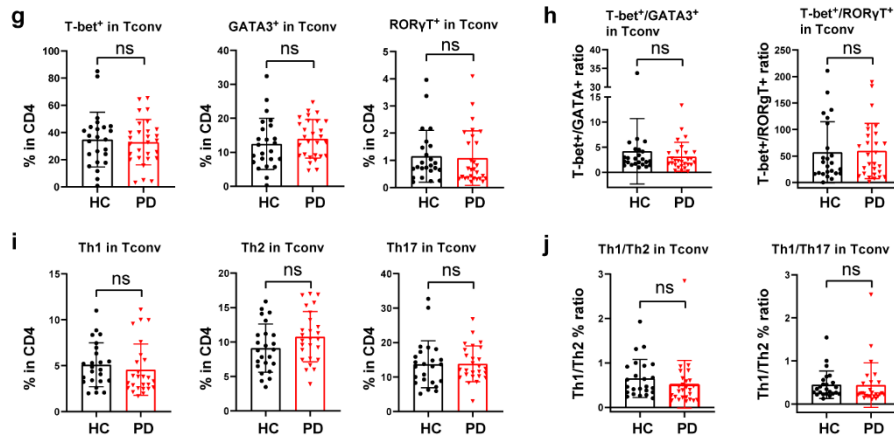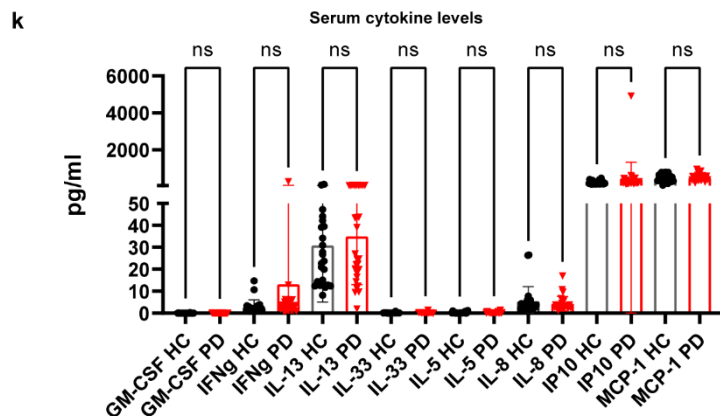

**Supplementary Fig. 5. CD4 TCM frequency is reduced while the balance among CD4 T-helper subsets is unaffected in early-to-mid stage iPD.**

**a-e** Scatter dot plots showing the frequency of naïve (**a**), TCM (central memory) (**b**), intermediate (**c**), effector (**d**) and TEMRA (**e**) among CD4 T cells quantified by FCM. **f** Gating strategy to define CD4 Th1, Th2 and Th17 subsets based on the combinations of the expression of the chemokine receptors CXCR3/CD183, CCR4/CD194 and CCR6/CD196 using flow-cytometry analysis. Arrows indicate the gating workflow. **g** Scatter dot plots showing the expression of the master transcriptions factor (T-bet, GATA3 or ROR $\gamma$ T) of CD4 T helper subset in PD and HC. **h** Ratios between T-bet<sup>+</sup>/GATA3<sup>+</sup> and T-bet<sup>+</sup>/ROR $\gamma$ T<sup>+</sup> CD4 T cells in PD and HC, reflecting the ratios of Th1/Th2 and Th1/Th17, respectively. **i** Scatter dot plots showing the frequency of Th1 (CXCR3<sup>+</sup>CCR6<sup>-</sup>CCR4<sup>-</sup>), Th2 (CXCR3<sup>-</sup>CCR6<sup>-</sup>CCR4<sup>+</sup>) and Th17 (CXCR3<sup>-</sup>CCR6<sup>+</sup>) cells based on the combinations of the expression of the chemokine receptors CXCR3, CCR4 and CCR6. **j** Ratios of Th1/Th2 and Th1/Th17 cells in PD and HC. The ratios in **j** were calculated based on data of **i**. **k** Serological levels of other analysed cytokines/chemokines (except for those shown in **Fig. 2**) in PD and HC. Some values of the participants were excluded for certain cytokines because one technical replicate was detected while another replicate was below detection range or below fit curve range. The results were analysed using unpaired two-tailed Student's *t* test (**a-e**, **g-j**) or using Brown-Forsythe and Welch ANOVA test with Dunnett's T3 multiple comparison test (**k**). Data are presented as mean  $\pm$  standard deviation (s.d.). Each symbol represents the measurement from one individual (**a-e**, **g-j**, **k**). ns, not significant; all significant P-values are indicated. HC, healthy controls, n=24; PD, patients with Parkinson's disease, n=28; FCM, flow cytometry. Of note (**i**, **j**), two PD samples were excluded for CD183-related results where CD183 abs was missing during staining. Source data are provided as a Source Data file.

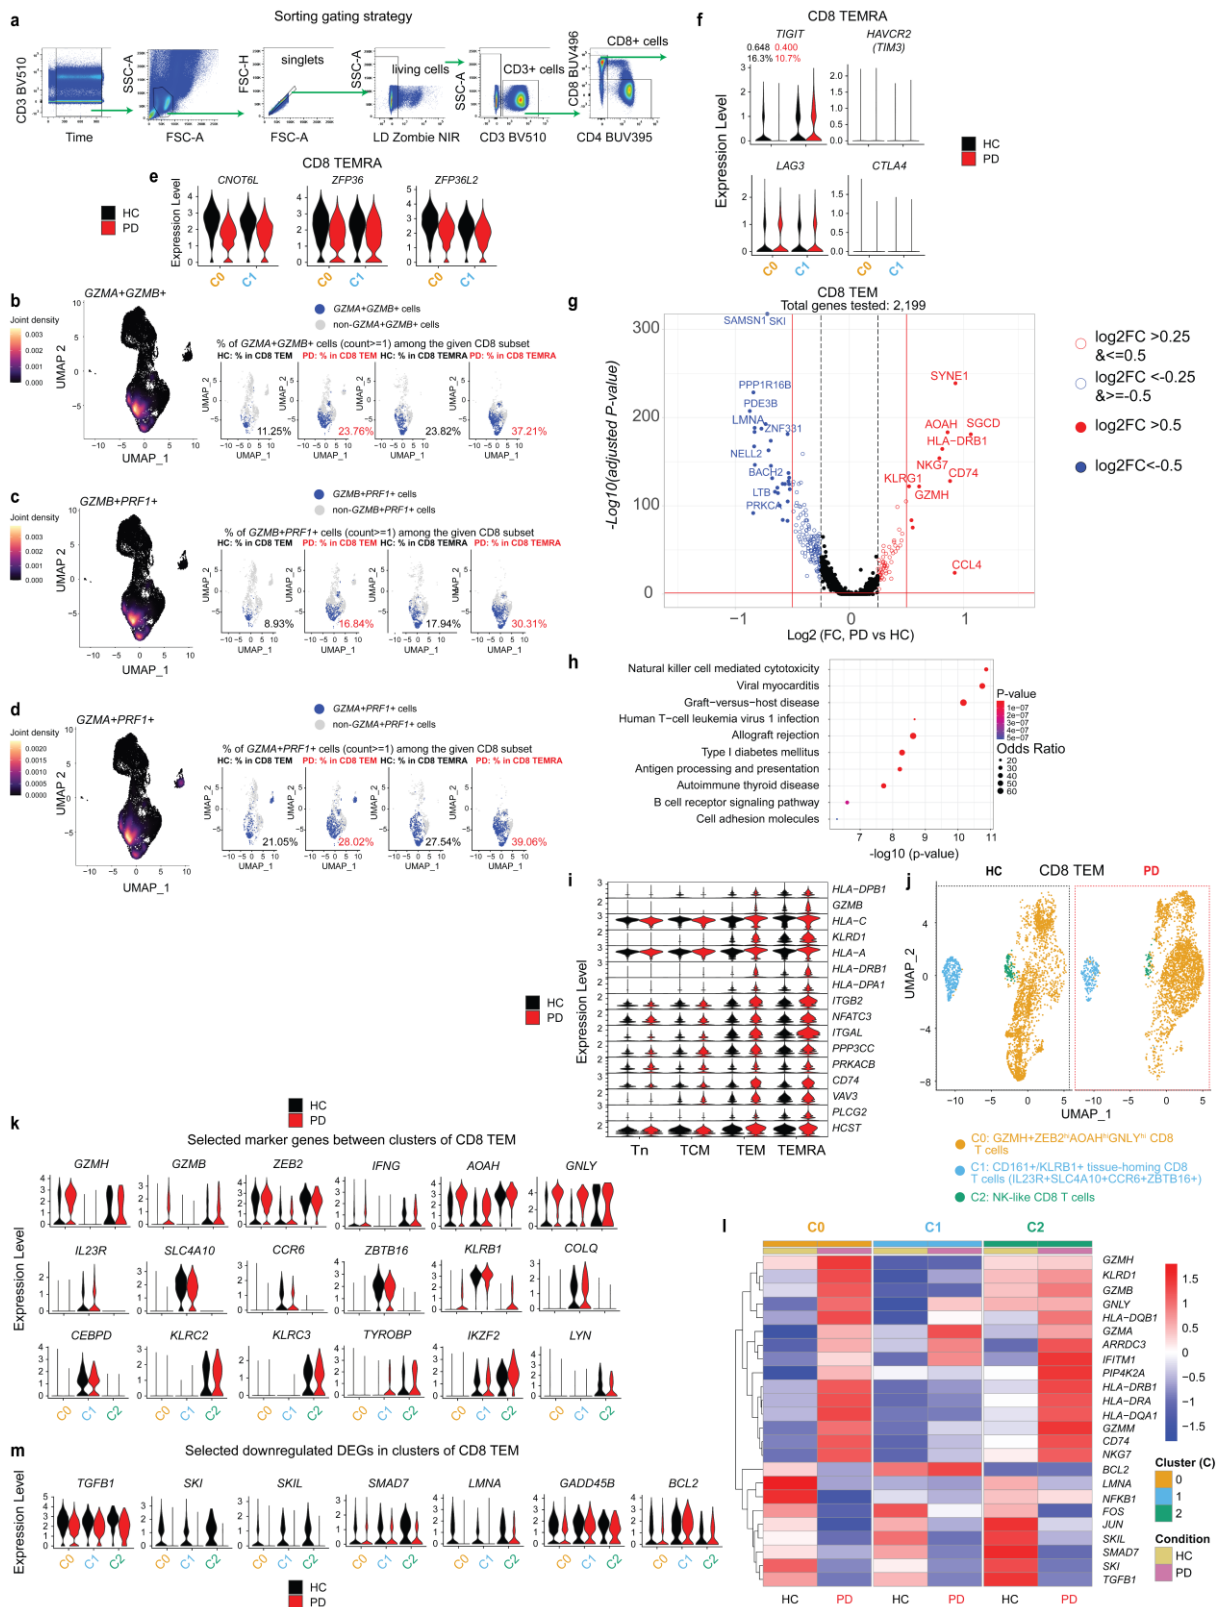

Supplementary Fig. 6. Cytotoxicity pathways are also enhanced in CD8 TEM of early-to-mid stage iPD as revealed by scRNA-seq.

**a** Gating strategy to sort four CD8 subsets (the last step in Fig. 6A). **b-d** UMAP (left) showing joint density of GZMA and GZMB (**b**), of GZMB and PRF1 (**c**) and of GZMA and PRF1 (**d**)



among all the CD8 T cells. Right, UMAP showing the cells co-expressing the indicated markers. For visual comparability, random downsampling was employed to display the same number of cells between different conditions and subsets. **e, f** Violin plots of selected downregulated (**e**) or exhaustion (**f**) markers in different clusters of CD8 TEMRA. The numbers under *TIGIT* indicate either the percentage of the cells expressing *TIGIT* (count $\geq$ 1) or the average *TIGIT* expression in CD8 TEMRA of either PD (red) or HC (black) for Cluster 0 (C0). **g** Volcano plot showing the expression changes in CD8 TEM. The selected top up- or down-regulated genes (ranked based on gene score) were marked in red or blue labels, respectively. Vertical red solid lines indicates the log<sub>2</sub>FC value of 0.5 and -0.5, respectively, while the horizontal red line indicates  $-\log_{10}(0.05)$ . **h** Top enriched KEGG pathways among upregulated genes in iPD vs HC in CD8 TEM. **i** Violin plots of selected DEGs involved in the top-enriched KEGG pathways (from **h**). **j** UMAP showing the unsupervised clustering analysis of CD8 TEM from iPD vs HC. For visual comparability, CD8 TEM cells were randomly downsampled to the same number between groups. **k, m** Violin plots of selected markers distinguishing different clusters (**k**) or selected iPD down-regulated genes (**m**) within CD8 TEM. **l** Heatmap of the selected most up- or down-regulated DEGs across different clusters in CD8 TEM of iPD vs HC. P-values in **g** and **h** were analyzed using two-tailed non-parametric Wilcoxon Rank test adjusted based on Bonferroni correction and the one-tailed Fisher's exact test, respectively. The genes selected in **k-m** were analyzed using two-tailed non-parametric Wilcoxon Rank test adjusted based on Bonferroni correction (only those with an adjusted P-value  $\leq$ 0.05 were considered). DEG, differentially-expressed genes; FC, fold change; UMAP, uniform manifold approximation and projection.

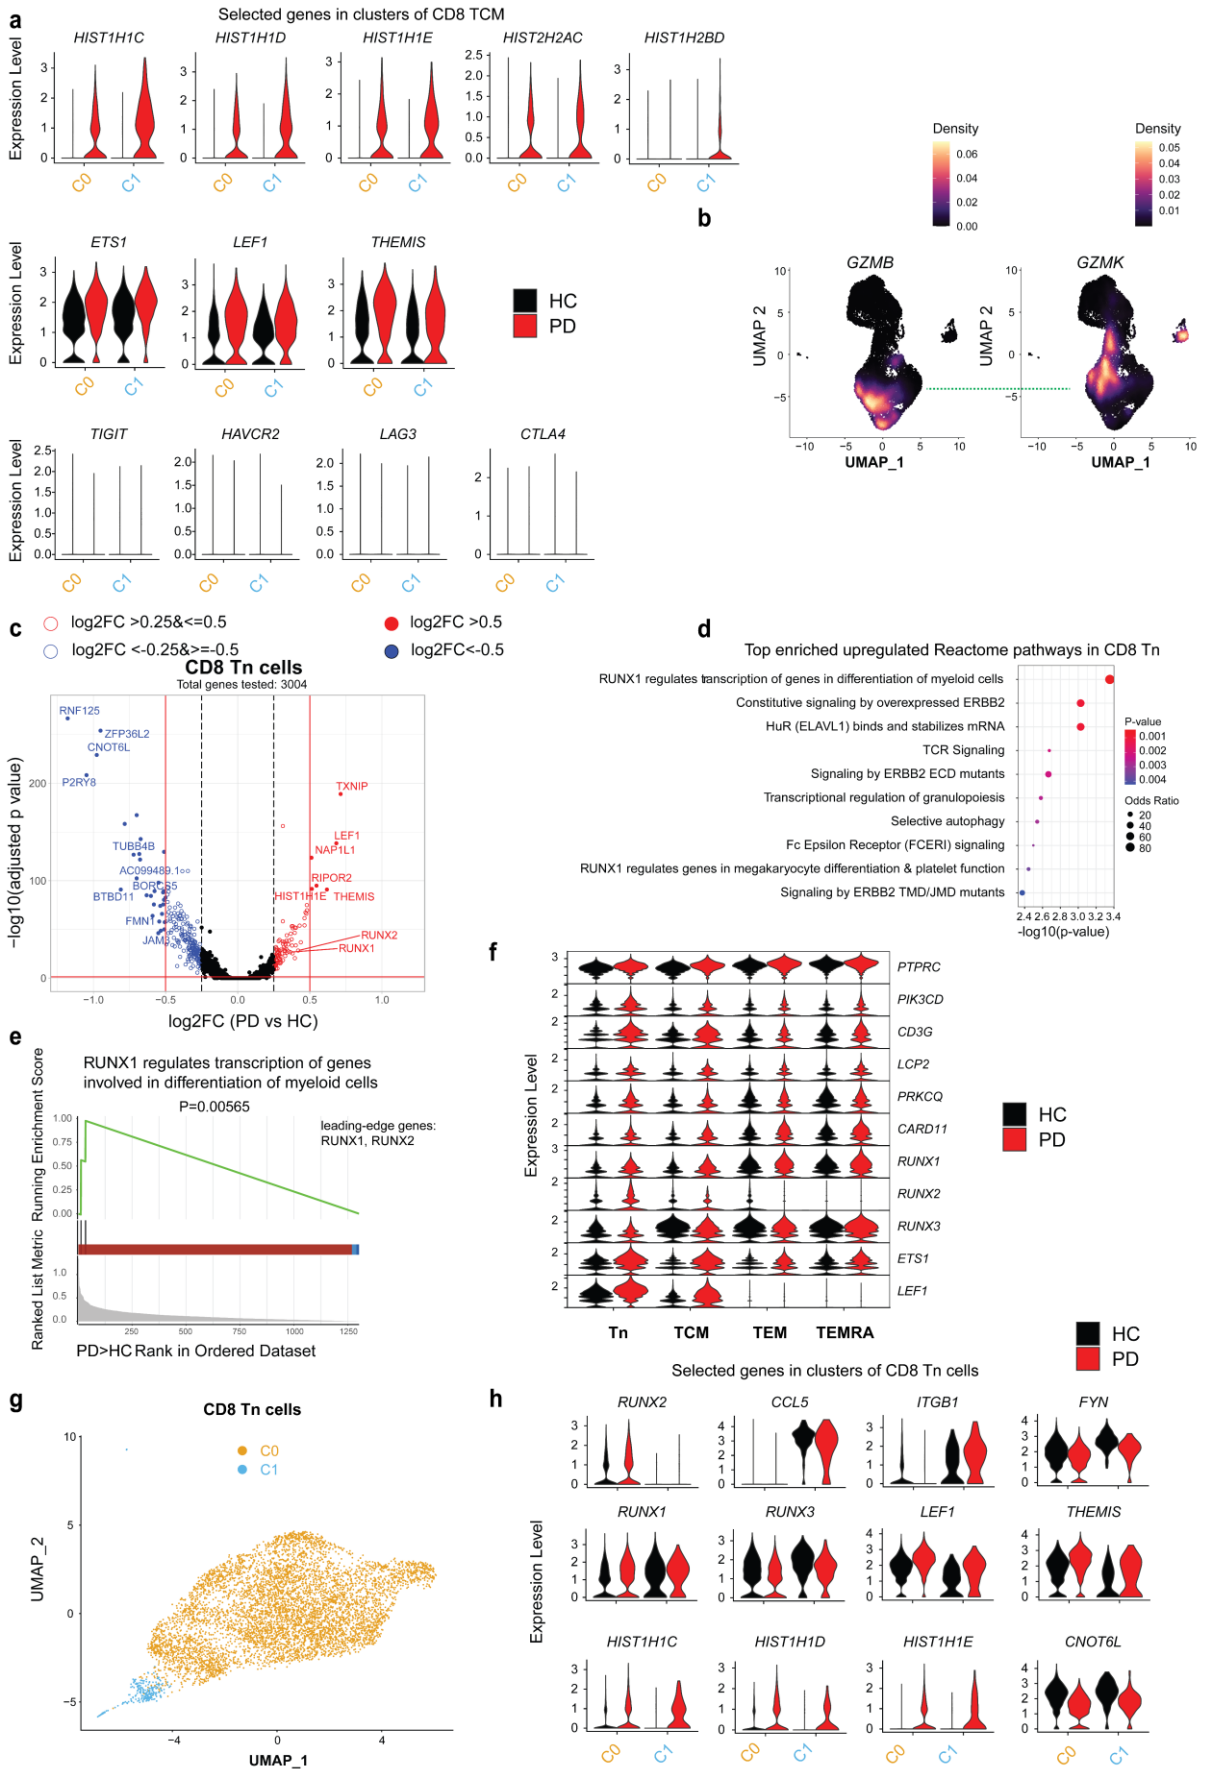

**Supplementary Fig. 7. Transcriptionally-reprogramming already occurs in CD8 Tn of early-to-mid stage iPD.**

**a** Violin plots of selected top DEGs or exhaustion marker genes in clusters of CD8 TCM. **b** UMAP showing the density of *GZMB* or *GZMK* expression in all the individual CD8 T cells analyzed by scRNA-seq. A dashed green line highlights the boundary between major *GZMB*- and *GZMK*-expressing zones. **c** Volcano plot showing the gene expression of CD8 Tn in iPD vs HC. The selected top up- or down-regulated genes (ranked based on gene score) were marked in red or blue labels, respectively. *RUNX1* and *RUNX2* were additionally labelled. Vertical red line indicates the log<sub>2</sub>FC value of 0.5 or -0.5 while the horizontal red line indicates  $-\log_{10}(0.05)$ . **d** Top-ranked enriched Reactome pathways among up-regulated genes in CD8 Tn of iPD vs HC. **e** GSEA plot of the pathway showing the *RUNX1* transcription regulation involved in myeloid cell differentiation. The lower part showing the rank distribution of the genes involved in the indicated pathway. The list on the right showing the leading-edge genes. **f** Violin plots showing the genes involved in TCR signaling or early differentiation of CD8 T cells. **g** UMAP plot showing the unsupervised clustering analysis of CD8 Tn. **h** Violin plots of either selected genes distinguishing clusters or selected DEGs in iPD vs HC. P-values in **c** and **h** were analyzed using two-tailed non-parametric Wilcoxon Rank Sum test adjusted based on Bonferroni correction. In **h**, only those with an adjusted P-value  $\leq 0.05$  were included. P-values in **d** and **e** were analyzed using the one-tailed Fisher's exact test and the empirical phenotype-based permutation test, respectively. Each dot represents one single cell in **b**, **g**. DEG, differentially-expressed genes; FC, fold change; UMAP, uniform manifold approximation and projection.

**Supplementary Table 1. The exclusion criteria of the cohort.**

| Exclusion Criteria                             |                                                                                                                                             |
|------------------------------------------------|---------------------------------------------------------------------------------------------------------------------------------------------|
| <b>History or presence of medication taken</b> | Corticosteroids<br>Cytostatic drugs<br>Immunosuppressive treatment<br>Iodine*                                                               |
| <b>Medical history</b>                         | Acute Infection<br>Autoimmune Disorders<br>Chronic Infections<br>Endocrine Diseases<br>Gastrointestinal Diseases<br>Haematological Diseases |

|  |                                                                                          |
|--|------------------------------------------------------------------------------------------|
|  | Immunodeficiency<br>Malignancies<br>Neurologic Diseases (other than Parkinson's disease) |
|--|------------------------------------------------------------------------------------------|

\* Iodine treatment could interfere with the mass cytometry (CyTOF) staining and thus was also excluded.

### Supplementary Table 2. Basic demographics and clinical information of the participants in various sub-cohorts analysed in this work.

| Initial discovery cohort (fresh sampling)                |                  |                  |                                         |
|----------------------------------------------------------|------------------|------------------|-----------------------------------------|
|                                                          | PD (n=28)        | HC (n=24)        | P-value                                 |
| Male, % (n)                                              | 68 (19)          | 58 (14)          | 0.477 (two-tailed Chi square test)      |
| Age at sampling in years, mean (SD) <sup>£</sup>         | 64.9 (6.97)      | 63.92 (3.75)     | 0.54 (two-tailed Student <i>t</i> test) |
| Age of Onset, mean (SD)                                  | 58.14 (9.42)     | NA               | NA                                      |
| Disease duration from diagnosis (years), mean (SD)       | 6.64 (4.12)      | NA               | NA                                      |
| Disease duration from initial symptom onset, mean (SD)   | 8.19 (5.37)      | NA               | NA                                      |
| Family History of Parkinson's Disease, % (n)             | 43 (12)          | NA               | NA                                      |
| Hoehn and Yahr (H&Y) Staging scale, mean (SD)            | 2.3 (0.42)       | NA               | NA                                      |
| UPDRS-III*, mean (SD)                                    | 39.69 (13.15)    | NA               | NA                                      |
| LEDD <sup>‡</sup> , mean (SD)                            | 610.58 (344.06)  | NA               | NA                                      |
| MOCA <sup>€</sup> , mean (SD)                            | 25.21 (3.82)     | NA               | NA                                      |
| Validation cohort (cryopreserved PBMC; all iPD)          |                  |                  |                                         |
| Male, % (n)                                              | 73 (8 out of 11) | 58 (5 out of 12) | 0.133 (two-tailed Chi square test)      |
| Age at sampling, mean (SD)                               | 64.90 (3.96)     | 63.46 (3.72)     | 0.38 (two-tailed Student <i>t</i> test) |
| Age of Onset, mean (SD)                                  | 59.08 (5.54)     | NA               | NA                                      |
| Disease duration from diagnosis (years), mean (SD)       | 4.45 (3.21)      | NA               | NA                                      |
| Disease duration from initial symptom onset, mean (SD)   | 5.82 (3.89)      | NA               | NA                                      |
| Hoehn and Yahr (H&Y) Staging scale, mean (SD)            | 2.0 (0.27)       | NA               | NA                                      |
| Participants for scRNA-seq (cryopreserved PBMC; all iPD) |                  |                  |                                         |
| Female,% (n)                                             | 100 (5)          | 100 (4)          | NA (two-tailed Chi square test)         |
| Age at sampling, mean (SD)                               | 63.14 (4.08)     | 62.33 (2.68)     | 0.77 (two-tailed Student <i>t</i> test) |
| Age of Onset, mean (SD)                                  | 54.34 (9.17)     | NA               | NA                                      |
| Disease duration from diagnosis (years), mean (SD)       | 6.4 (7.40)       | NA               | NA                                      |
| Disease duration from initial symptom onset, mean (SD)   | 8.8 (9.55)       | NA               | NA                                      |
| Hoehn and Yahr (H&Y) Staging scale, mean (SD)            | All with 2.0     | NA               | NA                                      |

£descriptive statistics here includes information from all idiopathic and three genetic PD.

\*UPDRS-III: Motor Examination. The physician does a number of tests to rate the cardinal symptoms of PD such as rigidity, postural instability, facial expression etc.

¥LEDD: Levodopa Equivalent Daily Dose, so basically the sum of levodopa a patient is taking each day.

€MOCA: Montreal Cognitive Assessment. Provides an overall cognitive profile (0-30, with 30 meaning no cognitive deficits).

NA, no data available or not applicable; SD, standard deviation.

### Supplementary Table 3. List of CyTOF antibodies (Abs) used to stain the whole blood.

| Metal Isotope | Antibody            | Clone    | Manufacturer | Catalogue#             |
|---------------|---------------------|----------|--------------|------------------------|
| 89Y           | CD45                | HI30     | Fluidigm     | Part of MDIPA (201325) |
| 103Rh         | Live/Dead indicator |          | Fluidigm     | Part of MDIPA          |
| 141Pr         | CD196 (CCR6)        | G034E3   | Fluidigm     | Part of MDIPA          |
| 142Nd         | CD117 (c-kit)*      | 104D2    | Biolegend    | 313223                 |
| 143Nd         | CD123               | 6H6      | Fluidigm     | Part of MDIPA          |
| 144Nd         | CD19                | HIB19    | Fluidigm     | Part of MDIPA          |
| 145Nd         | CD4                 | RPA-T4   | Fluidigm     | Part of MDIPA          |
| 146Nd         | CD8a                | RPA-T8   | Fluidigm     | Part of MDIPA          |
| 147Sm         | CD11c               | Bu15     | Fluidigm     | Part of MDIPA          |
| 148Nd         | CD16                | 3G8      | Fluidigm     | Part of MDIPA          |
| 149Sm         | CD45RO              | UCHL1    | Fluidigm     | Part of MDIPA          |
| 150Nd         | CD45RA              | HI100    | Fluidigm     | Part of MDIPA          |
| 151Eu         | CD161               | HP-3G10  | Fluidigm     | Part of MDIPA          |
| 152Sm         | CD194 (CCR4)        | L291H4   | Fluidigm     | Part of MDIPA          |
| 153Eu         | CD25                | BC96     | Fluidigm     | Part of MDIPA          |
| 154Sm         | CD27                | O323     | Fluidigm     | Part of MDIPA          |
| 155Gd         | CD57                | HCD57    | Fluidigm     | Part of MDIPA          |
| 156Gd         | CD183 (CXCR3)       | G025H7   | Fluidigm     | Part of MDIPA          |
| 158Gd         | CD185 (CXCR5)       | J252D4   | Fluidigm     | Part of MDIPA          |
| 159Tb         | KLRG1*              | SA231A2  | Biolegend    | 367702                 |
| 160Gd         | CD28                | CD28.2   | Fluidigm     | Part of MDIPA          |
| 161Dy         | CD38                | HB-7     | Fluidigm     | Part of MDIPA          |
| 162Dy         | CD336 (NKP44)*      | P44-8    | Biolegend    | 325102                 |
| 163Dy         | CD56 (NCAM)         | NCAM16.2 | Fluidigm     | Part of MDIPA          |
| 164Dy         | TCRγδ               | B1       | Fluidigm     | Part of MDIPA          |
| 165Ho         | CD223 (LAG3)        | 11C3C65  | Fluidigm     | 3165037B               |
| 166Er         | CD294               | BM16     | Fluidigm     | Part of MDIPA          |
| 167Er         | CD197 (CCR7)        | G043H7   | Fluidigm     | Part of MDIPA          |

|       |              |          |           |               |
|-------|--------------|----------|-----------|---------------|
| 168Er | CD14         | 63D3     | Fluidigm  | Part of MDIPA |
| 169Tm | CD49d*       | 9F10     | Biolegend | 304302        |
| 170Er | CD3          | UCHT1    | Fluidigm  | Part of MDIPA |
| 171Yb | CD20         | 2H7      | Fluidigm  | Part of MDIPA |
| 172Yb | CD66b        | G10F5    | Fluidigm  | Part of MDIPA |
| 173Yb | HLA-DR       | LN3      | Fluidigm  | Part of MDIPA |
| 174Yb | IgD          | IA6-2    | Fluidigm  | Part of MDIPA |
| 175Lu | CD279 (PD-1) | EH12.2H7 | Fluidigm  | 3175008B      |
| 176Yb | CD127        | A019D5   | Fluidigm  | Part of MDIPA |

\* in-house conjugation using Maxpar X8 Antibody Labeling Kits MDIPA (201325, Fluidigm). The predicted theoretical quantity (ug) used per reaction for the in-house conjugated Abs CD117-142Nd, KLRG1-159Tb, NKP44-162Dy, CD49d-169Tm, PD-1-175Lu and LAG3-165Ho was 0.5, 0.17, 0.5, 0.05, 0.17 and 0.05, respectively. The theoretical concentration was estimated based on the expected average recovery rate of 60% for an antibody conjugation procedure.

**Supplementary Table 4. List of flow cytometry (FCM) Abs used to stain the PBMCs in this study.**

| Ab Target              | Fluorochrome | Dilution | Manufacturer | Reference | Clone  |
|------------------------|--------------|----------|--------------|-----------|--------|
| <b>Fc Blocking Abs</b> | /            | 1:50     | BD           | 564765    | Fc1    |
| <b>CD3*</b>            | BUV737       | 1:100    | BD           | 741822    | HIT3a  |
| <b>CD3*</b>            | BV510        | 1:100    | BD           | 564713    | HIT3a  |
| <b>CD4</b>             | BUV395       | 1:100    | BD           | 563550    | SK3    |
| <b>CD8</b>             | BUV496       | 1:100    | BD           | 564804    | RPA-T8 |
| <b>CD25</b>            | BV786        | 1:50     | BD           | 741035    | 2A3    |
| <b>CD25</b>            | BB515        | 1:50     | BD           | 564467    | 2A3    |
| <b>CD27</b>            | BB700        | 1:50     | BD           | 566450    | M-T271 |
| <b>CD28</b>            | BUV785       | 1:50     | BioLegend    | 302950    | CD28.2 |
| <b>CD31</b>            | BV605        | 1:50     | BD           | 562855    | WM59   |
| <b>CD39</b>            | BV711        | 1:50     | BioLegend    | 328228    | A1     |
| <b>CD45RA</b>          | BV421        | 1:50     | BioLegend    | 304130    | HI100  |
| <b>CD45RA</b>          | BV785        | 1:50     | BioLegend    | 304140    | HI100  |



|                              |              |       |                          |            |            |
|------------------------------|--------------|-------|--------------------------|------------|------------|
| <b>CD45RO</b>                | PE-CF594     | 1:50  | BD                       | 562299     | UCHL1      |
| <b>CD57</b>                  | FITC         | 1:50  | BD                       | 555619     | NK-1       |
| <b>CD71</b>                  | FITC         | 1:50  | BioLegend                | 334104     | CY1G4      |
| <b>CD98</b>                  | BV786        | 1:50  | BD                       | 744507     | UM7F8      |
| <b>CD122</b>                 | PE           | 1:50  | BioLegend                | 339006     | TU27       |
| <b>CD127 (IL7R)</b>          | BV421        | 1:50  | BD                       | 562436     | HIL-7R-M21 |
| <b>CD127 (IL7R)</b>          | BV711        | 1:50  | BioLegend                | 351328     | A019D5     |
| <b>CD183 (CXCR3)</b>         | PE           | 1:50  | BD                       | 560928     | 1C6/CXCR3  |
| <b>CD194 (CCR4)</b>          | APC          | 1:50  | BioLegend                | 359408     | L291H4     |
| <b>CD196 (CCR6)</b>          | PE-Cy7       | 1:50  | BD                       | 560620     | 11A9       |
| <b>CD197 (CCR7)</b>          | BV421        | 1:50  | BioLegend                | 353208     | G043H7     |
| <b>CD223 (LAG3)</b>          | BV711        | 1:50  | BioLegend                | 369320     | 11C3C65    |
| <b>CD278 (ICOS)</b>          | BV605        | 1:50  | BioLegend                | 313538     | C398.4A    |
| <b>CD279 (PD-1)</b>          | BV605        | 1:50  | BioLegend                | 329924     | EH12.2H7   |
| <b>GLUT1 (SLC2A1)</b>        | PE           | 1:500 | Abcam                    | ab209449   | EPR3915    |
| <b>KLRG1</b>                 | PE-Cy7       | 1:50  | BioLegend                | 368614     | 14C2A07    |
| <b>Intracellular markers</b> |              |       |                          |            |            |
| <b>CD152 (CTLA4)</b>         | PE-Cy5       | 1:20  | BD                       | 555854     | BNI3       |
| <b>FOXP3</b>                 | APC          | 1:20  | BioLegend                | 320114     | 206D       |
| <b>Phospho S6</b>            | AF488        | 1:20  | CST                      | 4803S      | D57.2.2E   |
| <b>Helios</b>                | Pacific Blue | 1:20  | BioLegend                | 137220     | 22F6       |
| <b>Ki-67</b>                 | Alex488      | 1:20  | BD                       | 561165     | B56        |
| <b>GATA3</b>                 | PE-Cy7       | 1:20  | BD                       | 560405     | L50-823    |
| <b>RORγT</b>                 | BV650        | 1:20  | BD                       | 563424     | Q21-559    |
| <b>T-bet</b>                 | PE           | 1:20  | BioLegend                | 644810     | 4B10       |
| <b>Eomes</b>                 | PE-Cy7       | 1:20  | Thermo Fisher Scientific | 25-4877-42 | WD1928     |

|           |         |       |                          |        |   |
|-----------|---------|-------|--------------------------|--------|---|
| Live/Dead | APC-Cy7 | 1:500 | Thermo Fisher Scientific | L34976 | / |
|-----------|---------|-------|--------------------------|--------|---|

\*, different fluorochromes of the same markers might be used in different staining panels as we simultaneously employed five staining panels to explore.

**Supplementary Table 5. CyTOF analysis reveals the percentages of major immune subsets among living CD45+ singlets or among the relevant parent gates in the peripheral fresh blood of early-to-mid stage iPD or matched HC aged 60-70 years.**

| No.                                | Items                                                                         | HC (n=24), mean (SD) | PD (n=28), Mean (SD) | P-value (two-tailed t test) |
|------------------------------------|-------------------------------------------------------------------------------|----------------------|----------------------|-----------------------------|
|                                    | Total number of living CD45+ singlets                                         | 627629 (136842)      | 679999 (155232)      | 0.22482                     |
| <b>Among living CD45+ singlets</b> |                                                                               |                      |                      |                             |
| 1                                  | ncMono plus interm Mono among living cells                                    | 0.847 (0.518)        | 0.75 (0.422)         | 0.476922                    |
| 2                                  | mDC among living cells                                                        | 0.253 (0.065)        | 0.215 (0.07)         | 0.062098                    |
| 3                                  | pDC among living cells                                                        | 0.111 (0.04)         | 0.097 (0.04)         | 0.24072                     |
| 4                                  | cMono among living cells                                                      | 5.964 (1.085)        | 5.913 (1.37)         | 0.887997                    |
| 5                                  | Basophils among living cells                                                  | 0.81 (0.445)         | 0.662 (0.253)        | 0.154289                    |
| 6                                  | NK among living cells                                                         | 3.658 (1.6)          | 3.53 (1.747)         | 0.794596                    |
| 7                                  | CD56 <sup>high</sup> CD57 <sup>-</sup> immature NK among living cells         | 0.224 (0.131)        | 0.16 (0.088)         | 0.04992                     |
| 8                                  | CD56 <sup>mid</sup> CD57 <sup>-</sup> NK among living cells                   | 1.619 (0.78)         | 1.549 (0.989)        | 0.788334                    |
| 9                                  | CD56 <sup>mid</sup> CD57 <sup>+</sup> late NK among living cells              | 1.815 (1.174)        | 1.823 (1.181)        | 0.982319                    |
| 10                                 | Total ILCs among living cells                                                 | 0.069 (0.042)        | 0.091 (0.127)        | 0.419163                    |
| 11                                 | ILC1 among living cells                                                       | 0.034 (0.021)        | 0.067 (0.098)        | 0.123848                    |
| 12                                 | ILC2 among living cells                                                       | 0.033 (0.033)        | 0.017 (0.015)        | 0.025059                    |
| 13                                 | ILC3 among living cells                                                       | 0.001 (0.002)        | 0.008 (0.029)        | 0.290684                    |
| 14                                 | B cells among living cells                                                    | 3.24 (1.419)         | 3.453 (3.736)        | 0.801529                    |
| 15                                 | CD27 <sup>+</sup> CD38 <sup>+</sup> plasma cells among living cells           | 0.02 (0.021)         | 0.015 (0.01)         | 0.313471                    |
| 16                                 | CD20 <sup>-</sup> HLADR <sup>+</sup> among living cells                       | 0.12 (0.37)          | 0.62 (2.09)          | 0.270256                    |
| 17                                 | CD20 <sup>+</sup> HLADR <sup>+</sup> among living cells                       | 3.082 (1.363)        | 2.731 (3.217)        | 0.635057                    |
| 18                                 | CD27 <sup>-</sup> IgD <sup>+</sup> naïve B cells among living cells           | 2.12 (1.25)          | 1.379 (1.282)        | 0.04885                     |
| 19                                 | CD27 <sup>+</sup> IgD <sup>-</sup> class-switched memory B among living cells | 0.395 (0.226)        | 0.385 (0.368)        | 0.911043                    |

|                          |                                                                                                       |                    |                    |          |
|--------------------------|-------------------------------------------------------------------------------------------------------|--------------------|--------------------|----------|
| 20                       | CD27 <sup>+</sup> IgD <sup>+</sup> IgM memory among living cells                                      | 0.39<br>(0.253)    | 0.781<br>(2.146)   | 0.39954  |
| 21                       | Total T cells among living cells                                                                      | 21.318<br>(5.235)  | 17.673<br>(4.946)  | 0.016814 |
| 22                       | TCRgd <sup>+</sup> classic T cells among living cells                                                 | 20.835<br>(5.119)  | 17.198<br>(4.728)  | 0.013785 |
| 23                       | CD8 <sup>+</sup> T among living cells                                                                 | 5.42<br>(2.514)    | 5.372<br>(2.671)   | 0.950139 |
| 24                       | CD45RA <sup>-</sup> CCR7 <sup>-</sup> CD8 TEM among living cells                                      | 0.795<br>(0.453)   | 0.748<br>(0.43)    | 0.712639 |
| 25                       | CD45RA <sup>-</sup> CCR7 <sup>+</sup> CD8 CM among living cells                                       | 1.528<br>(0.963)   | 0.955<br>(0.536)   | 0.012486 |
| 26                       | CD45RA <sup>+</sup> CCR7 <sup>-</sup> CD8 TEMRA among living cells                                    | 2.165<br>(1.829)   | 2.839<br>(2.109)   | 0.247063 |
| 27                       | CD45RA <sup>+</sup> CCR7 <sup>+</sup> CD8 naïve T among living cells                                  | 0.783<br>(0.567)   | 0.72<br>(0.613)    | 0.713217 |
| 28                       | CD4 <sup>+</sup> among living cells                                                                   | 14.776<br>(3.947)  | 11.321<br>(2.945)  | 0.001126 |
| 29                       | CD45RA <sup>-</sup> CD4 among living cells                                                            | 8.371<br>(2.389)   | 7.099<br>(1.927)   | 0.046814 |
| 30                       | CD4 CXCR3 <sup>+</sup> CCR6 <sup>-</sup> CCR4 <sup>-</sup> CXCR5 <sup>-</sup> Th1 among living cells  | 1.829<br>(0.745)   | 1.636<br>(0.958)   | 0.443708 |
| 31                       | CD4 CXCR3 <sup>-</sup> CCR6 <sup>-</sup> CCR4 <sup>+</sup> CXCR5 <sup>-</sup> Th2 among living cells  | 1.246<br>(0.535)   | 1.01<br>(0.41)     | 0.090831 |
| 32                       | CD4 CXCR3 <sup>-</sup> CCR6 <sup>+</sup> CCR4 <sup>+</sup> CXCR5 <sup>-</sup> Th17 among living cells | 0.519<br>(0.319)   | 0.549<br>(0.329)   | 0.749899 |
| 33                       | CD4 CXCR5 <sup>+</sup> Tfh among living cells                                                         | 1.741<br>(0.678)   | 1.304<br>(0.485)   | 0.012681 |
| 34                       | CD45RA <sup>-</sup> CCR7 <sup>-</sup> CD4 T among living cells                                        | 1.527<br>(0.594)   | 1.756<br>(0.81)    | 0.276958 |
| 35                       | CD45RA <sup>-</sup> CCR7 <sup>+</sup> CD4 T among living cells                                        | 6.848<br>(2.238)   | 5.345<br>(1.518)   | 0.008301 |
| 36                       | CD45RA <sup>+</sup> CCR7 <sup>-</sup> CD4 T among living cells                                        | 0.547<br>(0.598)   | 0.566<br>(0.647)   | 0.91715  |
| 37                       | CD45RA <sup>+</sup> CCR7 <sup>+</sup> CD4 T among living cells                                        | 5.699<br>(3.643)   | 3.55<br>(1.543)    | 0.00885  |
| 38                       | TCRgd <sup>+</sup> T among living cells                                                               | 0.483<br>(0.341)   | 0.475<br>(0.376)   | 0.943847 |
| 39                       | NKT among living cells                                                                                | 2.407<br>(2.604)   | 2.431<br>(1.738)   | 0.969286 |
| 40                       | CD8 <sup>+</sup> NKT among living cells                                                               | 1.33<br>(1.146)    | 1.722<br>(1.345)   | 0.287332 |
| 41                       | CD4 <sup>+</sup> NKT among living cells                                                               | 0.973<br>(1.737)   | 0.546<br>(0.869)   | 0.27652  |
| 42                       | Eosinophils among living cells                                                                        | 2.682<br>(1.914)   | 1.628<br>(1.005)   | 0.018555 |
| 43                       | Neutrophils among living cells                                                                        | 54.853<br>(13.872) | 62.153<br>(8.156)  | 0.028426 |
| <b>Among parent gate</b> |                                                                                                       |                    |                    |          |
| 44                       | ncMono plus interm Mono among CD3 <sup>-</sup> CD19 <sup>-</sup> CD56 <sup>-</sup> HLADR <sup>+</sup> | 11.35<br>(5.243)   | 10.469<br>(4.895)  | 0.550335 |
| 45                       | cDC among CD14 <sup>-</sup> CD38 <sup>+</sup>                                                         | 58.174<br>(5.712)  | 56.277<br>(9.996)  | 0.434193 |
| 46                       | pDC among CD14 <sup>-</sup> CD38 <sup>+</sup>                                                         | 25.269<br>(6.242)  | 25.391<br>(8.386)  | 0.955228 |
| 47                       | cMono among CD56 <sup>+</sup> HLADR <sup>+</sup>                                                      | 82.436<br>(5.429)  | 83.938<br>(5.407)  | 0.343294 |
| 48                       | Basophils among CD56 <sup>-</sup> HLADR <sup>-</sup>                                                  | 58.465<br>(18.293) | 55.279<br>(15.374) | 0.515111 |

|    |                                                                                                     |                    |                    |          |
|----|-----------------------------------------------------------------------------------------------------|--------------------|--------------------|----------|
| 49 | NK among CD3 <sup>-</sup> CD19 <sup>-</sup>                                                         | 28.807<br>(8.605)  | 28.745<br>(10.793) | 0.982812 |
| 50 | CD56 <sup>high</sup> CD57 <sup>-</sup> immature NK among NK                                         | 7.04<br>(4.954)    | 6.009<br>(5.045)   | 0.47997  |
| 51 | CD56 <sup>mid</sup> CD57 <sup>-</sup> among NK                                                      | 46.359<br>(13.894) | 43.532<br>(15.477) | 0.511909 |
| 52 | CD56 <sup>mid</sup> CD57 <sup>+</sup> late NK among NK                                              | 46.593<br>(16.195) | 50.501<br>(16.552) | 0.414395 |
| 53 | Total ILCs among CD14 <sup>-</sup> CD38 <sup>+</sup>                                                | 1.831<br>(1.191)   | 2.776<br>(3.886)   | 0.276966 |
| 54 | ILC1 among ILCs                                                                                     | 56.917<br>(22.262) | 67.578<br>(21.7)   | 0.100179 |
| 55 | ILC2 among ILCs                                                                                     | 40.648<br>(23.368) | 28.852<br>(22.595) | 0.082335 |
| 56 | ILC3 among ILCs                                                                                     | 2.447<br>(3.122)   | 3.641<br>(5.285)   | 0.356174 |
| 57 | CD19 B cells among CD66b <sup>-</sup> CD45 <sup>+</sup>                                             | 8.33<br>(3.671)    | 9.264<br>(8.883)   | 0.646487 |
| 58 | CD20 <sup>+</sup> HLADR <sup>+</sup> among B cells                                                  | 2.966<br>(7.355)   | 7.78<br>(20.574)   | 0.301677 |
| 59 | CD27 <sup>+</sup> CD38 <sup>+</sup> plasma cells among CD20 <sup>-</sup> HLADR <sup>+</sup> B cells | 40.636<br>(23.249) | 41.301<br>(22.297) | 0.919915 |
| 60 | CD20 <sup>+</sup> HLADR <sup>+</sup> among B cells                                                  | 95.712<br>(7.352)  | 90.113<br>(22.339) | 0.265394 |
| 61 | CD27 <sup>-</sup> IgD <sup>+</sup> naïve among CD20 <sup>+</sup> HLADR <sup>+</sup>                 | 66.453<br>(14.11)  | 54.928<br>(20.903) | 0.032729 |
| 62 | CD27 <sup>+</sup> IgD <sup>-</sup> class-switched memory among CD20 <sup>+</sup> HLADR <sup>+</sup> | 13.723<br>(6.809)  | 17.912<br>(9.271)  | 0.085198 |
| 63 | CD27 <sup>+</sup> IgD <sup>+</sup> IgM memory among CD20 <sup>+</sup> HLADR <sup>+</sup>            | 13.893<br>(8.827)  | 17.886<br>(16.107) | 0.303826 |
| 64 | CD56 <sup>-</sup> among CD3 <sup>+</sup> CD19 <sup>-</sup>                                          | 89.615<br>(7.828)  | 86.881<br>(6.587)  | 0.19508  |
| 65 | TCRgd <sup>-</sup> classic T cells among total T cells                                              | 97.757<br>(1.451)  | 97.493<br>(1.734)  | 0.574621 |
| 66 | CD4 <sup>-</sup> CD8 <sup>+</sup> among classic T cells                                             | 25.705<br>(9.137)  | 30.118<br>(9.619)  | 0.1116   |
| 67 | CD45RA <sup>-</sup> CCR7 <sup>-</sup> TEM among CD8                                                 | 15.245<br>(7.516)  | 13.889<br>(4.561)  | 0.446601 |
| 68 | CD45RA <sup>-</sup> CCR7 <sup>+</sup> CM among CD8                                                  | 28.582<br>(11.591) | 19.871<br>(10.181) | 0.007914 |
| 69 | CD45RA <sup>+</sup> CCR7 <sup>-</sup> TEMRA among CD8                                               | 36.179<br>(17.486) | 49.607<br>(16.594) | 0.008928 |
| 70 | CD45RA <sup>+</sup> CCR7 <sup>+</sup> naïve among CD8                                               | 17.326<br>(14.998) | 14.272<br>(11.24)  | 0.424869 |
| 71 | CD4 <sup>+</sup> CD8 <sup>-</sup> among classic T cells                                             | 71.145<br>(9.198)  | 66.911<br>(9.867)  | 0.132923 |
| 72 | Th1 among CD4 CCR4 <sup>-</sup> CXCR5 <sup>-</sup>                                                  | 61.282<br>(16.004) | 54.486<br>(16.115) | 0.150608 |
| 73 | Th2 among CD4 CCR4 <sup>+</sup> CXCR5 <sup>-</sup>                                                  | 35.101<br>(11.204) | 34.506<br>(11.046) | 0.854118 |
| 74 | Th17 among CD4 CCR4 <sup>+</sup> CXCR5 <sup>-</sup>                                                 | 14.757<br>(7.026)  | 18.987<br>(11.054) | 0.127509 |
| 75 | Tfh among CD4 CD45RA <sup>-</sup>                                                                   | 20.455<br>(3.61)   | 18.299<br>(4.566)  | 0.079396 |
| 76 | CD45RA <sup>-</sup> CCR7 <sup>-</sup> TEM among CD4                                                 | 12.154<br>(8.916)  | 15.618<br>(5.296)  | 0.102741 |
| 77 | CD45RA <sup>-</sup> CCR7 <sup>+</sup> CM among CD4                                                  | 47.508<br>(12.756) | 47.847<br>(9.05)   | 0.914884 |

|    |                                                                 |                    |                    |          |
|----|-----------------------------------------------------------------|--------------------|--------------------|----------|
| 78 | CD45RA <sup>+</sup> CCR7 <sup>-</sup> TEMRA among CD4           | 4.052<br>(4.889)   | 4.934<br>(5.083)   | 0.545261 |
| 79 | CD45RA <sup>+</sup> CCR7 <sup>+</sup> naïve among CD4           | 35.278<br>(16.482) | 30.65<br>(10.146)  | 0.240098 |
| 80 | TCRgd <sup>+</sup> T among CD56 <sup>-</sup>                    | 2.24<br>(1.452)    | 2.506<br>(1.736)   | 0.570601 |
| 81 | Total NKT among CD56 <sup>+</sup>                               | 85.402<br>(12.74)  | 83.294<br>(15.719) | 0.616183 |
| 82 | CD8 <sup>+</sup> NKT among NKT                                  | 59.129<br>(20.227) | 70.188<br>(16.402) | 0.041839 |
| 83 | CD4 <sup>+</sup> NKT among NKT                                  | 33.515<br>(22.057) | 20.707<br>(16.692) | 0.026705 |
| 84 | Eosinophils among CD66b <sup>+</sup> CD45 <sup>mid</sup>        | 4.529<br>(3.466)   | 2.604<br>(1.61)    | 0.014893 |
| 85 | Neutrophils among CD66b <sup>+</sup> CD45 <sup>mid</sup>        | 90.811<br>(19.671) | 97.055<br>(1.653)  | 0.114084 |
| 86 | CD27 <sup>+</sup> CD38 <sup>+</sup> plasma cells among B cells  | 0.64<br>(0.58)     | 0.91<br>(1.11)     | 0.304309 |
| 87 | CD27 <sup>+</sup> IgD <sup>+</sup> naïve among B cells          | 64.28<br>(15.04)   | 51.7<br>(23.15)    | 0.033506 |
| 88 | CD27 <sup>+</sup> IgD <sup>-</sup> class-switched among B cells | 12.74<br>(4.82)    | 15.03<br>(8.13)    | 0.252162 |
| 89 | CD27 <sup>+</sup> IgD <sup>+</sup> IgM memory among B cells     | 13.01<br>(7.8)     | 15.6<br>(15.92)    | 0.489398 |

**Supplementary Table 6. List of Abs used for the intracellular cytotoxic marker analysis via FCM and/or extracellular Abs for CD8 subset sorting via FACS.**

| Marker   | Fluorochrome    | Dilution | Manufacturer | Reference | Clone  | Application         | Extra-cellular or intra-cellular | Lot number |
|----------|-----------------|----------|--------------|-----------|--------|---------------------|----------------------------------|------------|
| CD8      | BUV496          | 1/100    | BD           | 612942    | RPA-T8 | Cytotoxic & Sorting | Extra-cellular                   | 2213972    |
| CD4      | BUV395          | 1/100    | BD           | 563550    | SK3    | Cytotoxic & Sorting | Extra-cellular                   | 1313997    |
| CD45RA   | BV785           | 1/50     | Biolegend    | 304140    | HI100  | Cytotoxic & Sorting | Extra-cellular                   | B369489    |
| CD3      | BV510           | 1/20     | BD           | 564713    | HIT3a  | Cytotoxic & Sorting | Extra-cellular                   | 2129056    |
| CCR7     | BV421           | 1/50     | Biolegend    | 353208    | G043H7 | Cytotoxic & Sorting | Extra-cellular                   | B361376    |
| CD45RO   | PE-CF594        | 1/50     | BD           | 562299    | UCHL1  | Cytotoxic & Sorting | Extra-cellular                   | 1333677    |
| Perforin | FITC            | 1/30     | Biolegend    | 353310    | B-D48  | Cytotoxic           | Intra-cellular                   | B336273    |
| GZMB     | RY586           | 1/750    | BD           | 568133    | GB11   | Cytotoxic           | Intra-cellular                   | 2056267-1  |
| GZMA     | Alexa Fluor 700 | 1/150    | Biolegend    | 507210    | CB9    | Cytotoxic           | Intra-cellular                   | B322484    |

|      |                    |      |    |        |       |           |                    |         |
|------|--------------------|------|----|--------|-------|-----------|--------------------|---------|
| GZMK | Alexa Fluor<br>647 | 1/30 | BD | 566655 | G3H69 | Cytotoxic | Intra-<br>cellular | 2234680 |
|------|--------------------|------|----|--------|-------|-----------|--------------------|---------|

Of note, for the extracellular and intracellular mastermix, the final volume was 50  $\mu$ L and 100  $\mu$ L diluted in Brilliant Stain Buffer per reaction, respectively.

### Supplementary References

Massena, S., Christoffersson, G., Vågesjö, E., Seignez, C., Gustafsson, K., et al. (2015). "Identification and characterization of VEGF-A–responsive neutrophils expressing CD49d, VEGFR1, and CXCR4 in mice and humans." *Blood* **126**(17): 2016-2026. DOI: 10.1182/blood-2015-03-631572.
